# Supplementary material for: Activation mode of the eukaryotic m2G10 tRNA methyltransferase Trm11 by its partner protein Trm112
Source: PubMed Central journal article supplement — Nucleic Acids Res. 2016 Dec 16;45(4):1971–82. doi: 10.1093/nar/gkw1271 (PMC5389515; doi:10.1093/nar/gkw1271), 2016-12-16

# **Activation mode of the eukaryotic m<sup>2</sup>G10 tRNA methyltransferase Trm11 by its partner protein Trm112**

**Gabrielle Bourgeois<sup>1</sup>, Julien Marcoux<sup>2\*</sup>, Jean-Michel Saliou<sup>2\*\*</sup>, Sarah Cianférani<sup>2</sup> and Marc Graille<sup>1</sup>**

<sup>1</sup>Laboratoire de Biochimie, Ecole polytechnique, CNRS, Université Paris-Saclay, 91128 Palaiseau cedex, France

<sup>2</sup>Laboratoire de Spectrométrie de Masse BioOrganique (LSMBO), Université de Strasbourg, CNRS, IPHC UMR 7178, F-67000 Strasbourg, France;

\*Current Address: IPBS, CNRS, UMR 5089, 205 Route de Narbonne, 31077 Toulouse, France.

\*\*Current address: Center for Infection and Immunity of Lille (CIIL), Institut Pasteur de Lille, CNRS UMR 8204, INSERM U1019, Université Lille Nord de France, 1 rue du Pr. Calmette, 59000 Lille, France.

Corresponding author:

Marc Graille. Tel: +33 (0)169334890. Email: marc.graille@polytechnique.edu

**Keywords:** tRNA modifying enzyme, methyltransferase, S-adenosyl-L-methionine, translation.

**Running title:** Insights into Trm11-Trm112 tRNA methyltransferase

## Materials and methods

### Circular dichroism

CD spectra were recorded using a Jobin-Yvon Mark VI circular dichrograph at a scan speed of 0.2 nm/s using a Quartz cuvette with 0.1 cm path length. Blanks were run before each spectrum and subtracted from the raw data. Three spectra were averaged to increase the signal-to-noise ratio. The final protein concentration was 10  $\mu$ M in 10 mM Tris-HCl buffer (pH 8) containing 150 mM NaCl and the assays were carried out at 20°C. The results are presented as normalized  $\Delta\epsilon$  values on the basis of the amino acid mean residue mass of 110 Da for protein. Taking into account a sensitivity of  $\delta(\Delta A) = 10^{-6}$  for the apparatus, the biomolecule concentration and the optical path-length of the cuvette, measurements were obtained at a precision of  $\delta(\Delta\epsilon) = \pm 0.01 \text{ M}^{-1}\cdot\text{cm}^{-1}$  per residue.

### Size-exclusion chromatography – Multi-angle laser light scattering analysis (SEC-MALLS)

A sample of 100  $\mu$ L of ScTrm11-Trm112 complex (1 mg/mL) was injected at a flow rate of 0.75 mL/min on a Superdex<sup>TM</sup> 200 Increase 10/300 GL column (GE-Healthcare) equilibrated in buffer A (20 mM Tris-HCl pH 7.5, 200 mM NaCl, 5 mM  $\beta$ -mercaptoethanol). Elution was followed by a UV-Visible spectrophotometer, a RID-20A refractive index detector (Shimadzu), a MiniDawn TREOS detector (Wyatt Technology). The data were collected and processed with the program ASTRA 6.1 (Wyatt Technology).  $M_w$  was directly calculated from the absolute light scattering measurements using a  $dn/dc$  value of 0.183.

### Figure legends

#### Figure S1: Sequence alignment between *TkoTrm11* and *S. cerevisiae* Trm11.

Strictly conserved residues are in white on a black background. Partially conserved amino acids are boxed. Secondary structure elements assigned from the *TkoTrm11* crystal structure are indicated above the alignment. Black stars indicate *TkoTrm11* residues mutated by Hirata *et al.* (1).

#### Figure S2: Biophysical characterization of *S. cerevisiae* Trm11 protein and Trm11-Trm112 complex.

- A. CD spectrum of yeast Trm11 purified in the absence of Trm112.
- B. The Trm11-Trm112 complex is heterodimeric in solution. Left: SEC-MALLS analysis of yeast Trm11-Trm112 complex. The refractive index for the eluted sample is shown in blue, revealing the presence of a single peak. Right: Zoom on the main peak (refractive index in blue on the left y axis) and distribution of the molecular mass calculated from light scattering along this peak (red curve, right y axis).

**Figure S3: Binding of SAM to *S. cerevisiae* Trm11-Trm112 complexes.**

Upper panels: ITC data obtained by injecting SAM into corresponding Trm11-Trm112 complexes at 20°C. Lower panels show the fit to the binding curve using a binding site model.

**Figure S4: Characterization of Trm11-Trm112 complex formation and of the effect of Trm112 on SAM binding to Trm11 by ITC.**

- A. Control experiment showing that the injection of Trm112 into buffer at 10°C does not generate a signal comparable to that observed for the injection of Trm112 into Trm11 (Fig.3A).
- B. The Trm11 D286R mutant does not interact with wild-type Trm112. This experiment was performed at 10°C.
- C. The Trm112 R53E mutant does not interact with wild-type Trm11. This experiment was performed at 10°C.
- D. Titration of Trm11 (40 μM; left) or Trm112 (39 μM; right) by SAM (400 μM) at 10°C.

**Figure S5: Schematic representation of Trm11 (top) and Trm112 (bottom) peptides monitored in our HDX-MX experiments.**

**Figure S6: HDX kinetics of all Trm11 peptides.**

Red circles and blue boxes correspond to data extracted from Trm11 alone and Trm11-Trm112 complex, respectively. Error bars represent standard deviations from the mean of three replicates.

**Figure S7: HDX kinetics of all Trm112 peptides.**

Red circles and blue boxes correspond to data extracted from Trm112 alone and Trm11-Trm112 complex, respectively. Error bars represent standard deviations from the mean of three replicates.

**Table S1: Primers used in this study.**

| Name              | Purpose                                             | Sequences                                                |
|-------------------|-----------------------------------------------------|----------------------------------------------------------|
| oMG267            | Cloning of tRNA <sup>Ile</sup> and transcript A (F) | TAATACGACTCACTATAGGGGGTCTCTTGGCCC                        |
| oMG335            | Production of Transcript A (R)                      | TGGTCTCTAGCGGGATCGAACC                                   |
| oMG78             | Production of Transcript B (F)                      | TAATACGACTCACTATAGGGGGTCTCTTGGCCCAG                      |
| oMG285            | Production of Transcript B (R)                      | TCTCTAGCGGGATCGAACC                                      |
| oMG318            | Mutation tRNA <sup>Ile</sup> -G10C/C25G (F)         | CTTG <u>CCCC</u> CAGTTGGTTAAGGG <u>ACC</u> GTGCTAA-TAACC |
| oMG319            | Mutation tRNA <sup>Ile</sup> -G10C/C25G (R)         | CACGGT <u>CCCT</u> TAACCAACTGGGG <u>CA</u> AGA-GACCCCC   |
| oMG301            | Mutation D238A Trm11 (F)                            | GGTTCGGCTATAGATGGCAGAATGATTCG                            |
| oMG302            | Mutation D238A Trm11 (R)                            | GCCATCTATAG <u>CCGA</u> ACCAATCACTAAAGAACC               |
| oMG303            | Mutation D286R Trm11 (F)                            | CTTGTCATTC <u>CGT</u> ACTATTTTGTGTGATCCTCC               |
| oMG304            | Mutation D286R Trm11 (R)                            | CAAAATAGTAC <u>G</u> AATGACAAGATTGTTTC                   |
| oMG305            | Mutation D291A Trm11 (F)                            | GTGTG <u>CTC</u> CTCCATATGGTATC                          |
| oMG306            | Mutation D291A Trm11 (R)                            | CCATATGGAGG <u>AG</u> CACACAAAATAGTATC                   |
| y-trm11-eag1-poly | Cloning of ScTrm11 in pKHS (F)                      | TTTTC GGCCGATTAATTTAAGAAGGAGATATATATATG AAGAAATATCTGCTG  |
| y-trm11-not1-poly | Cloning of ScTrm11 in pKHS (R)                      | TTTTTGC GGC CGC GTTAAAATTATTGAAGTACCG                    |

**Table S2: Plasmids used in this study**

| <b>Name</b> | <b>Vector</b> | <b>Product</b>                | <b>Marker</b>   | <b>Tag</b>  | <b>Reference</b>                     |
|-------------|---------------|-------------------------------|-----------------|-------------|--------------------------------------|
| pMG526      | pKHS          | Trm11                         | Kanamycin       | His6 (Cter) | This work                            |
| pVH451      | pET11a        | Trm112                        | Kanamycin       | His6 (Cter) | (2)                                  |
| pMG513      | pACYC-Duet1   | Trm112                        | Chloramphenicol | No          | Kind gift from Dr V. Heurgué-Harnard |
| pMG729      | pET11a        | Trm112 N123R                  | Ampicillin      | No          | (3)                                  |
| pMG730      | pET11a        | Trm112 A106E                  | Ampicillin      | No          | (3)                                  |
| pMG731      | pET11a        | Trm112 I118E                  | Ampicillin      | No          | (3)                                  |
| pMG732      | pET11a        | Trm112 Y120D                  | Ampicillin      | No          | (3)                                  |
| pMG735      | pET11a        | Trm112 E107K                  | Ampicillin      | No          | (3)                                  |
| pMG745      | pKHS          | Trm11 D238A                   | Kanamycin       | His6 (Cter) | This work                            |
| pMG476      | pKHS          | Trm11 D286R                   | Kanamycin       | His6 (Cter) | This work                            |
| pMG747      | pKHS          | Trm11 D291A                   | Kanamycin       | His6 (Cter) | This work                            |
| pILE        | pUC18         | tRNA <sup>Ile</sup>           | Ampicillin      |             | Kind gift from Dr B. Collinet        |
| pMG755      | pUC18         | tRNA <sup>Ile</sup> G10C/C25G | Ampicillin      |             | This work                            |

## Bibliography

1. Hirata, A., Nishiyama, S., Tamura, T., Yamauchi, A. and Hori, H. (2016) Structural and functional analyses of the archaeal tRNA m<sup>2</sup>G/m<sup>22</sup>G10 methyltransferase aTrm11 provide mechanistic insights into site specificity of a tRNA methyltransferase that contains common RNA-binding modules. *Nucleic Acids Res*, **44**, 6377-6390.
2. Heurgue-Hamard, V., Graille, M., Scrima, N., Ulryck, N., Champ, S., van Tilbeurgh, H. and Buckingham, R.H. (2006) The zinc finger protein Ynr046w is plurifunctional and a component of the eRF1 methyltransferase in yeast. *J Biol Chem*, **281**, 36140-36148.
3. Liger, D., Mora, L., Lazar, N., Figaro, S., Henri, J., Scrima, N., Buckingham, R.H., van Tilbeurgh, H., Heurgue-Hamard, V. and Graille, M. (2011) Mechanism of activation of methyltransferases involved in translation by the Trm112 'hub' protein. *Nucleic Acids Res*, **39**, 6249-6259.

# Figure S1

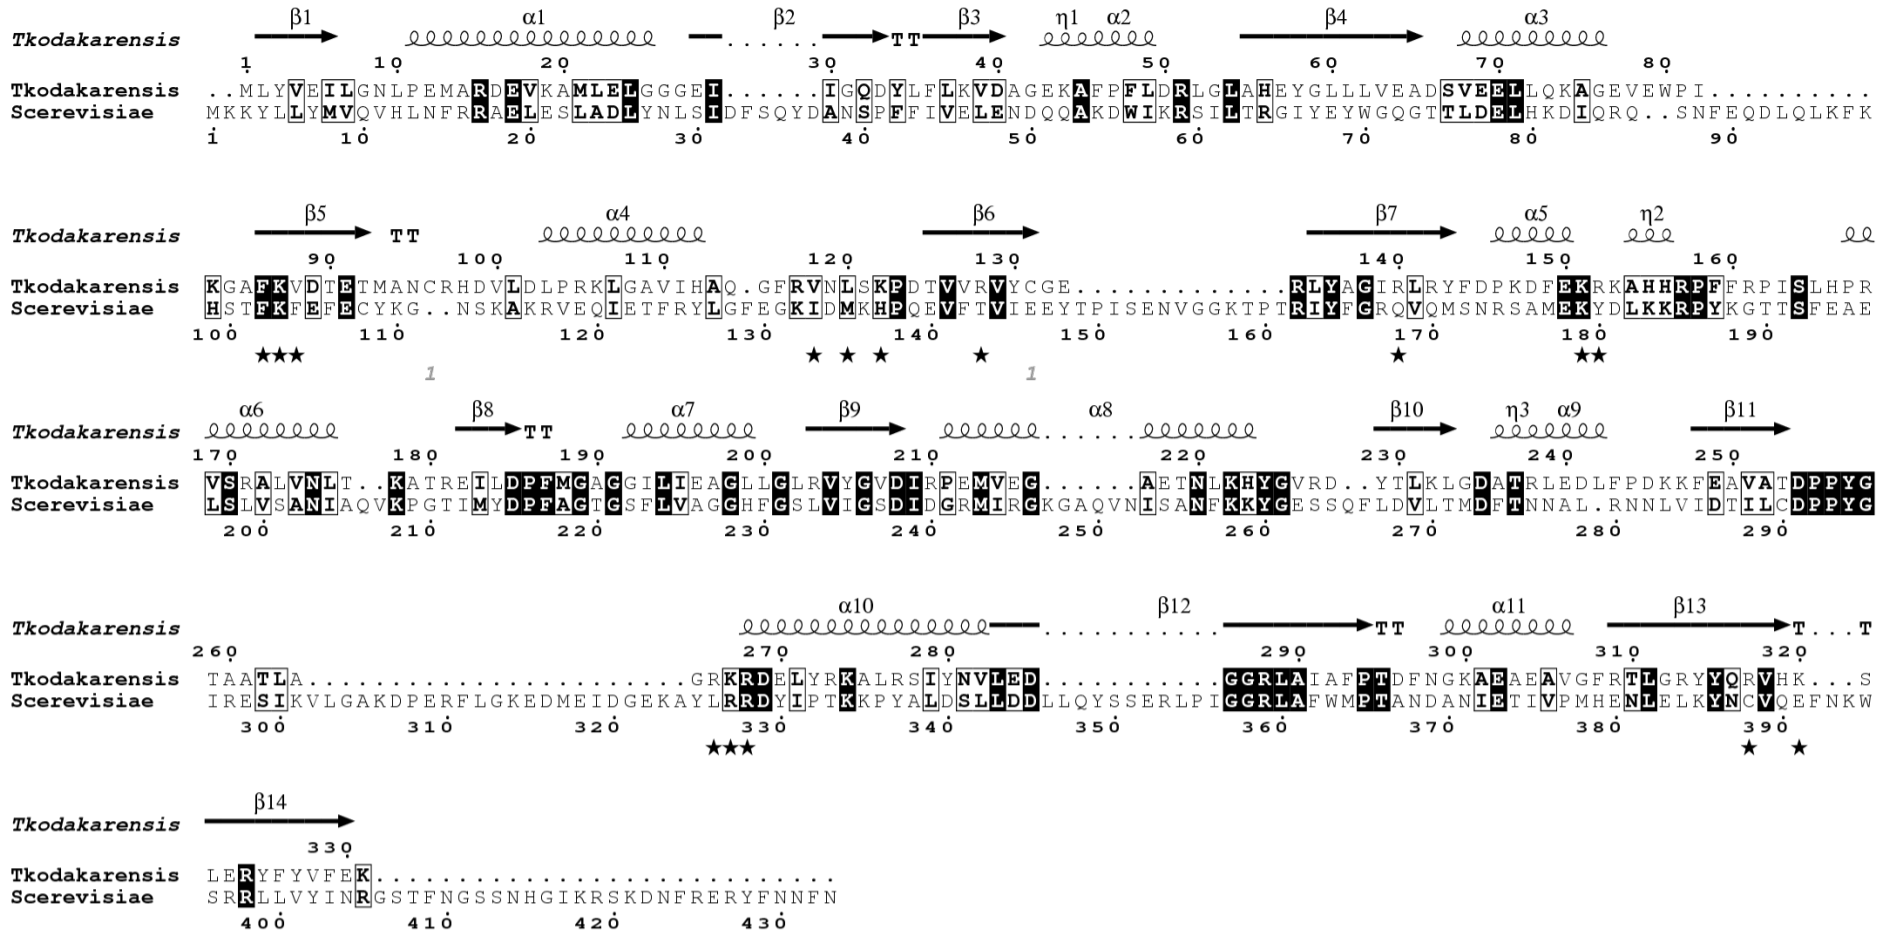

# Figure S2

## A

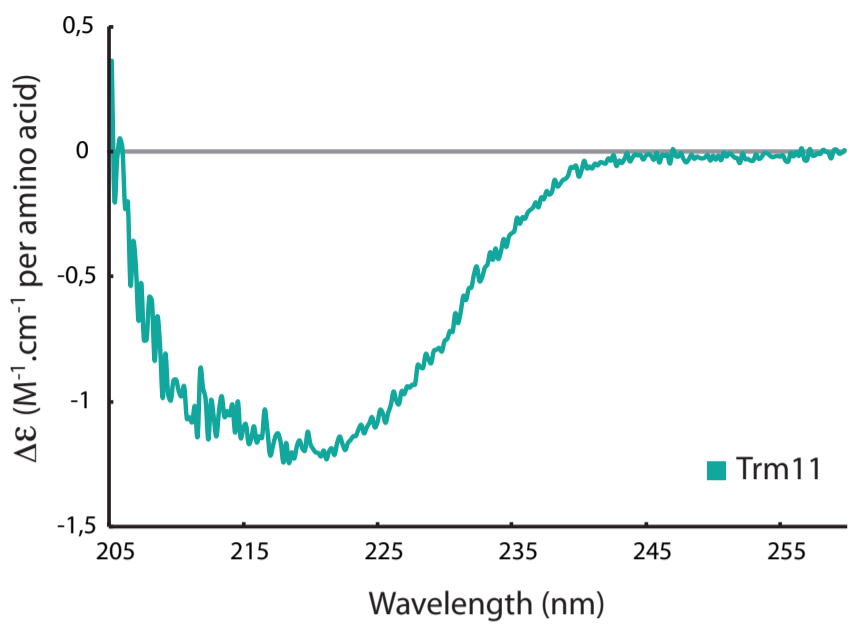

## B

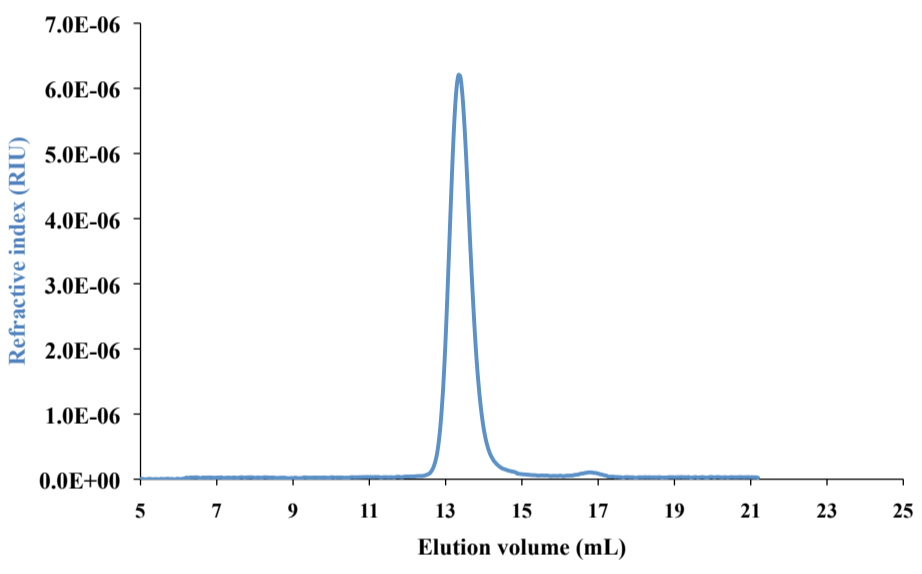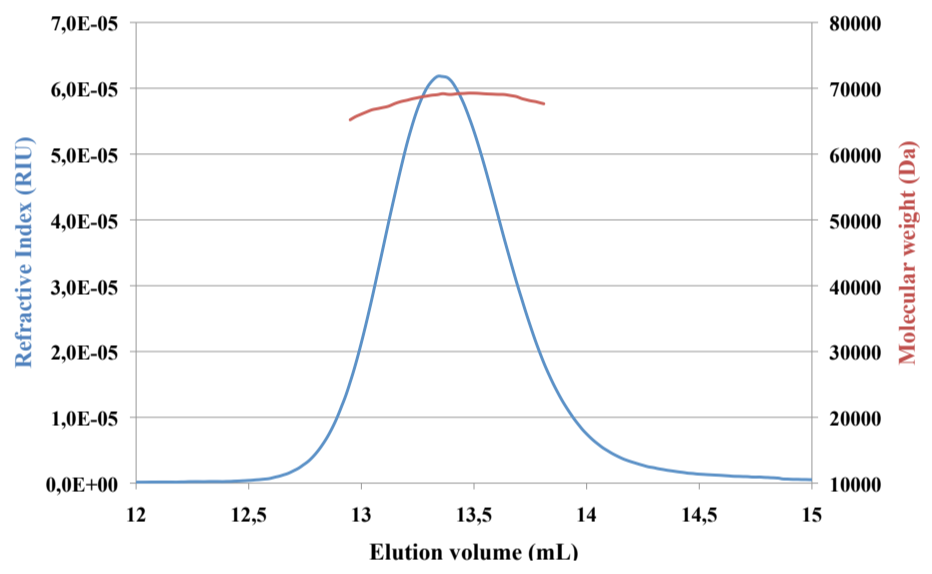



# Figure S3: Titration of various Trm11-trm112 complexes by SAM

## Trm112-Trm11 WT

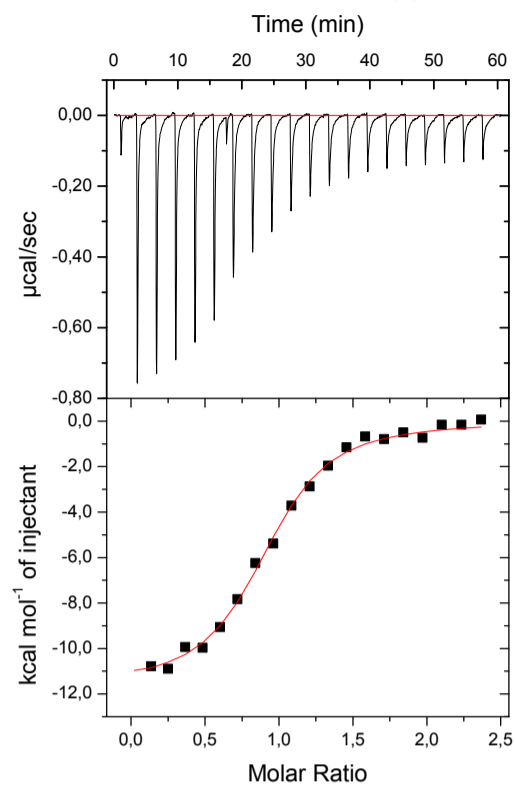

## Trm112-Trm11 D291A

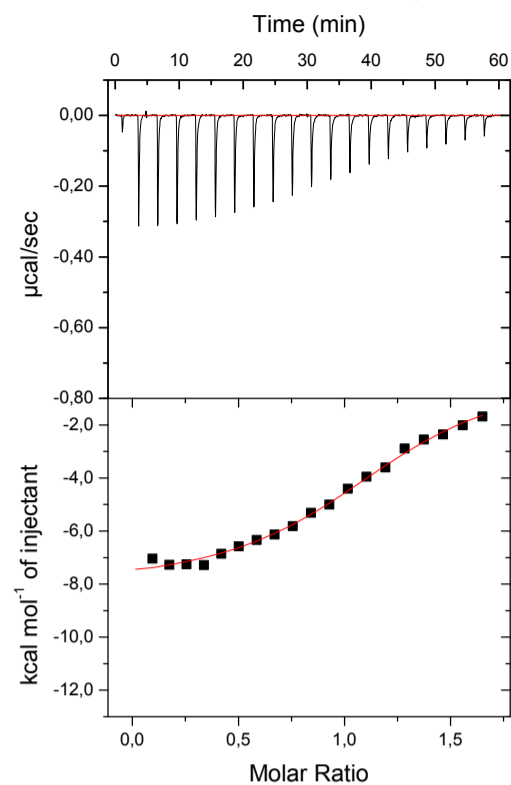

## Trm112-Trm11 D238A

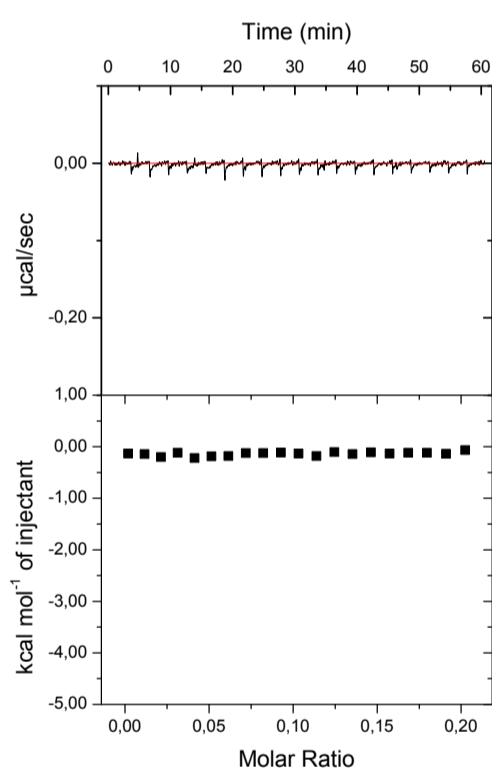

## Trm112 A106E-Trm11

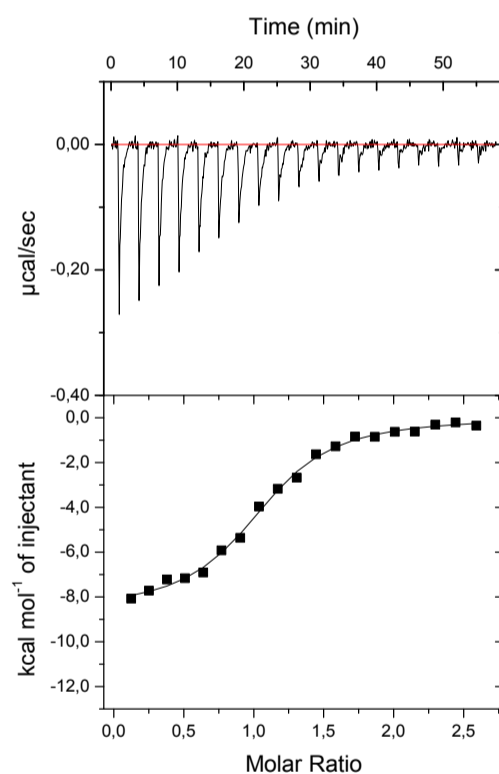

## Trm112 E107K-Trm11

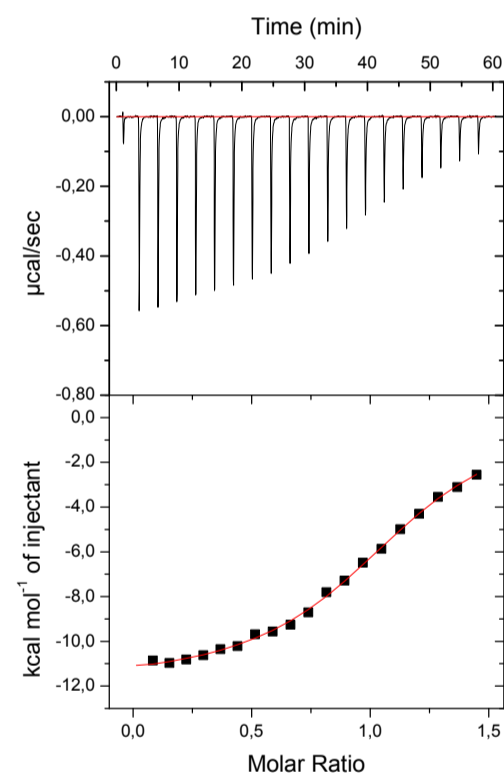

## Trm112 I118E-Trm11

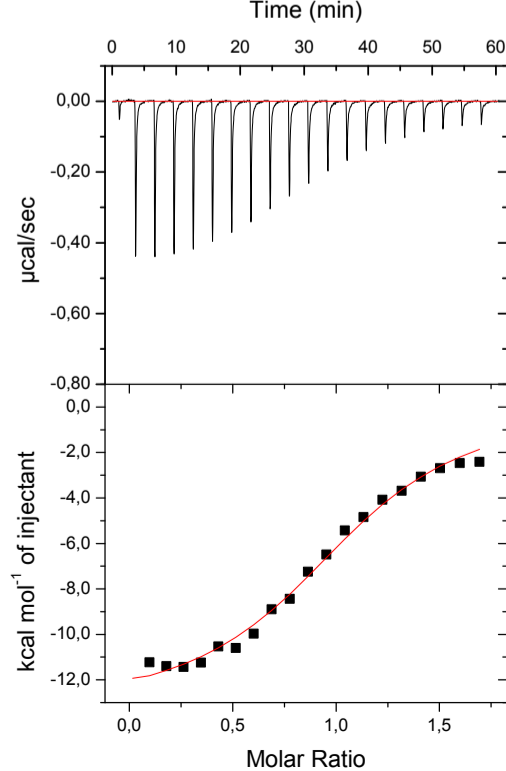

## Trm112 Y120D-Trm11

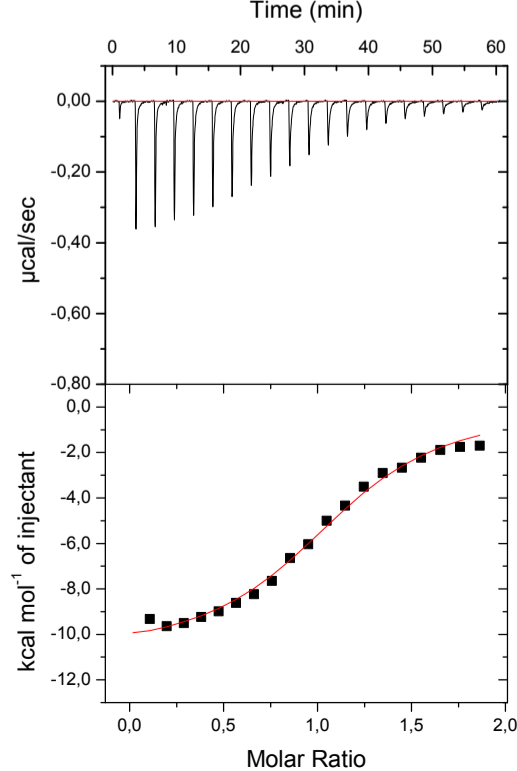

# Figure S4

## A

### Trm112 vs Buffer

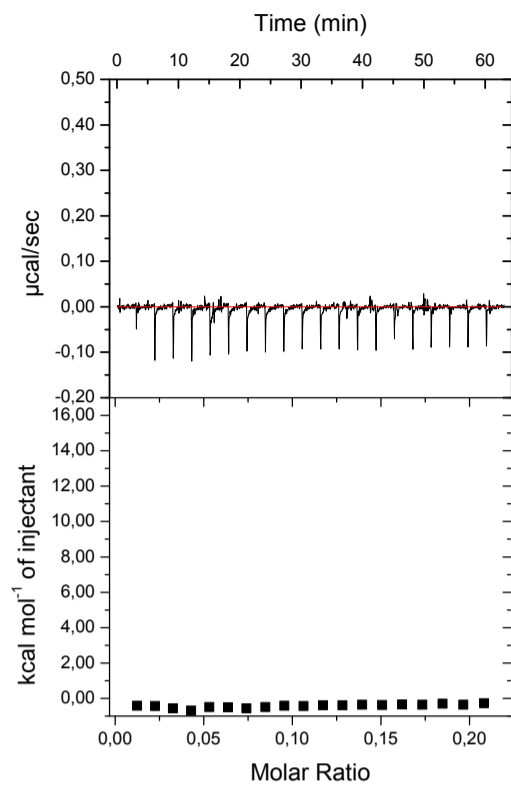

## B Trm112 vs Trm11 D286R

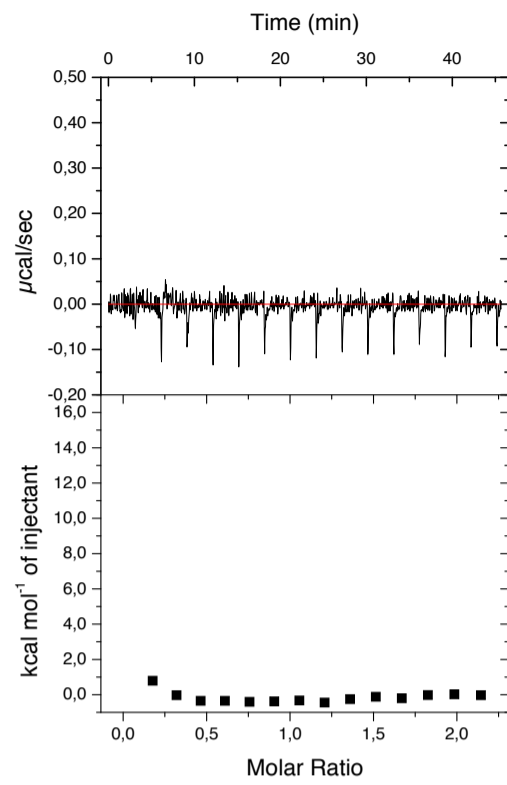

## C Trm112 R53E vs Trm11

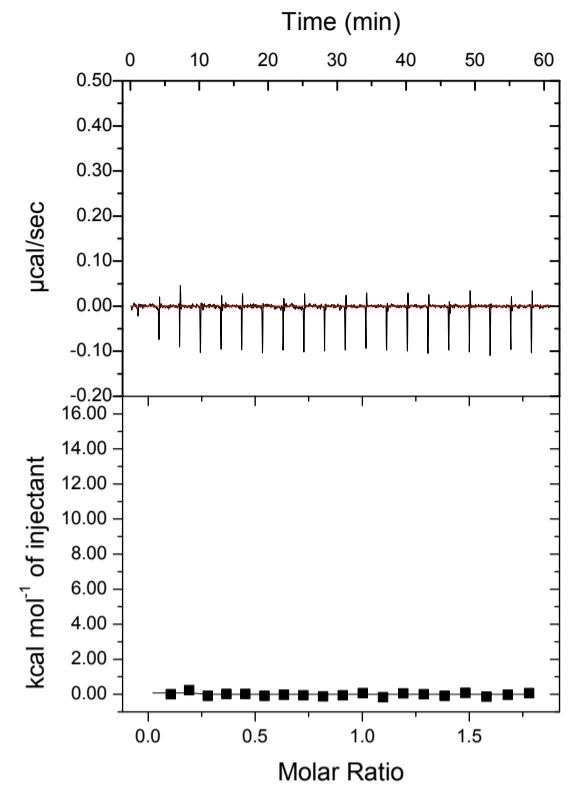

## D

### Trm11-Trm112 vs SAM

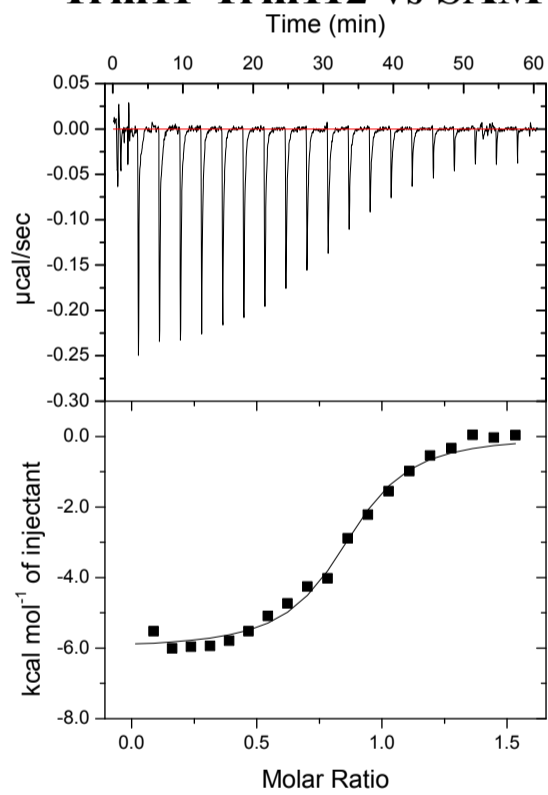

### Trm11 vs SAM

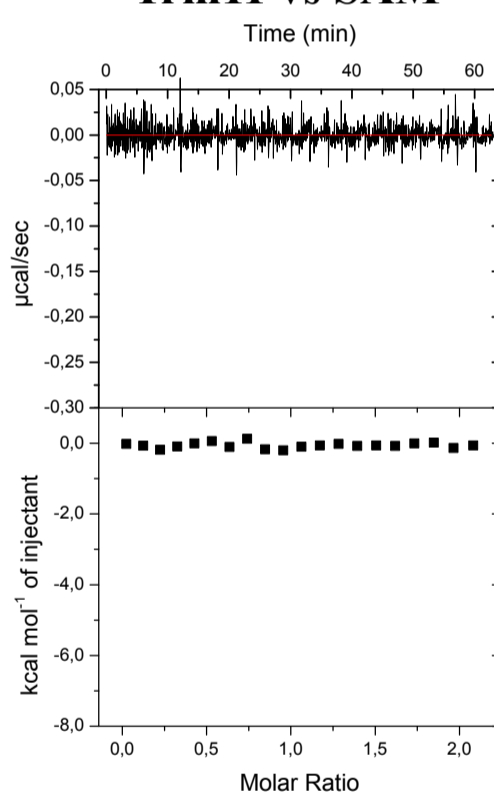

### Trm112 vs SAM

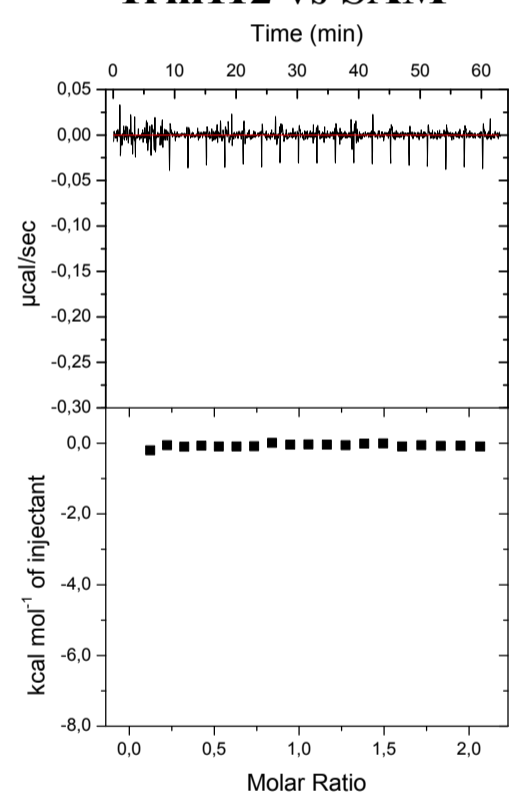

# Figure S5

## Trm11

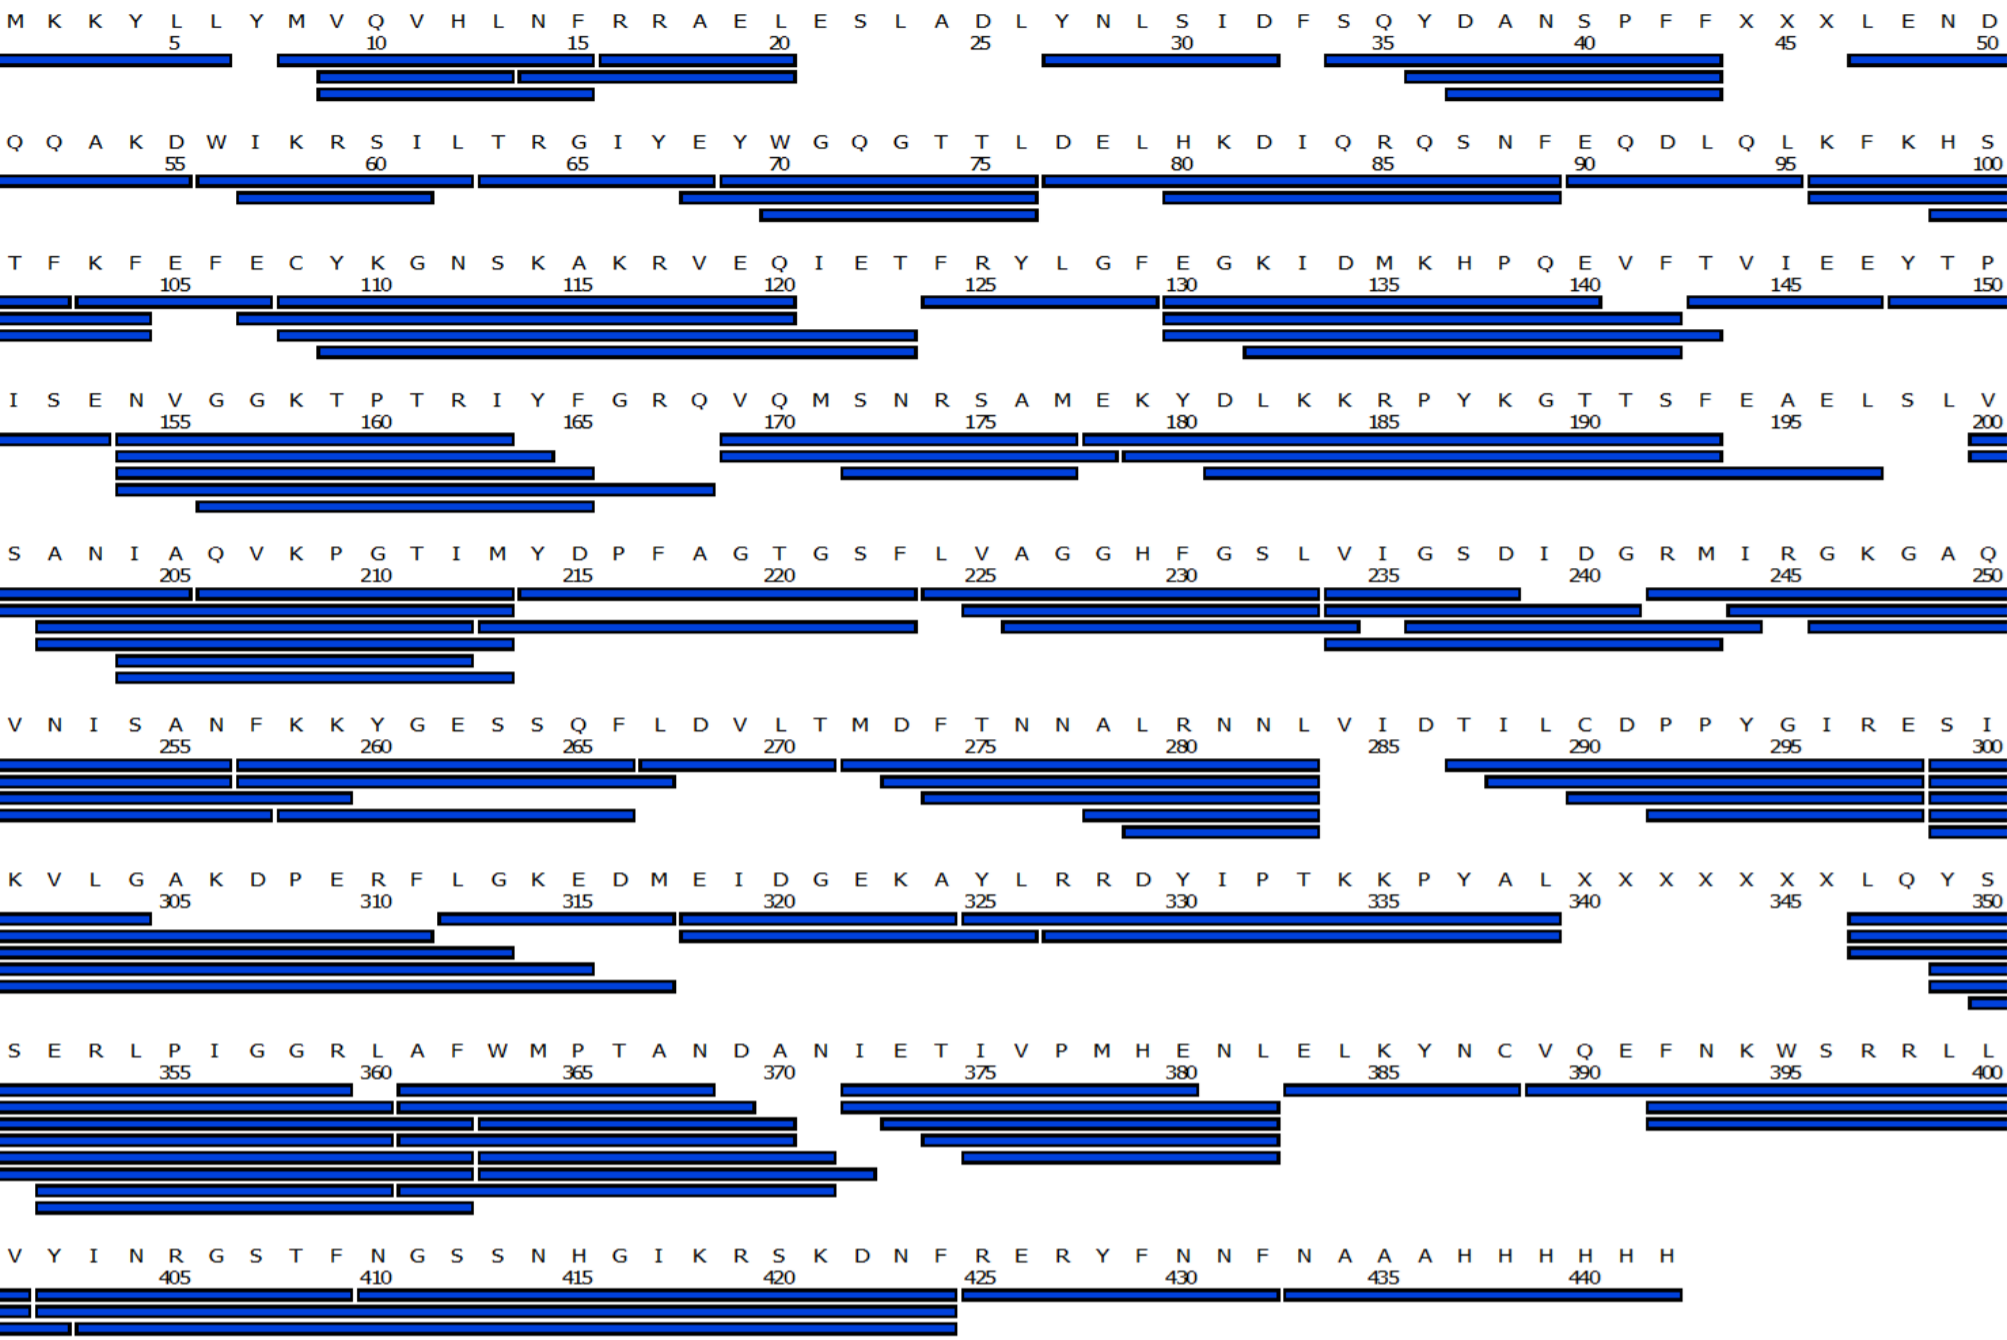

Total: 94.8% Coverage, 2.89 Redundancy

## Trm112

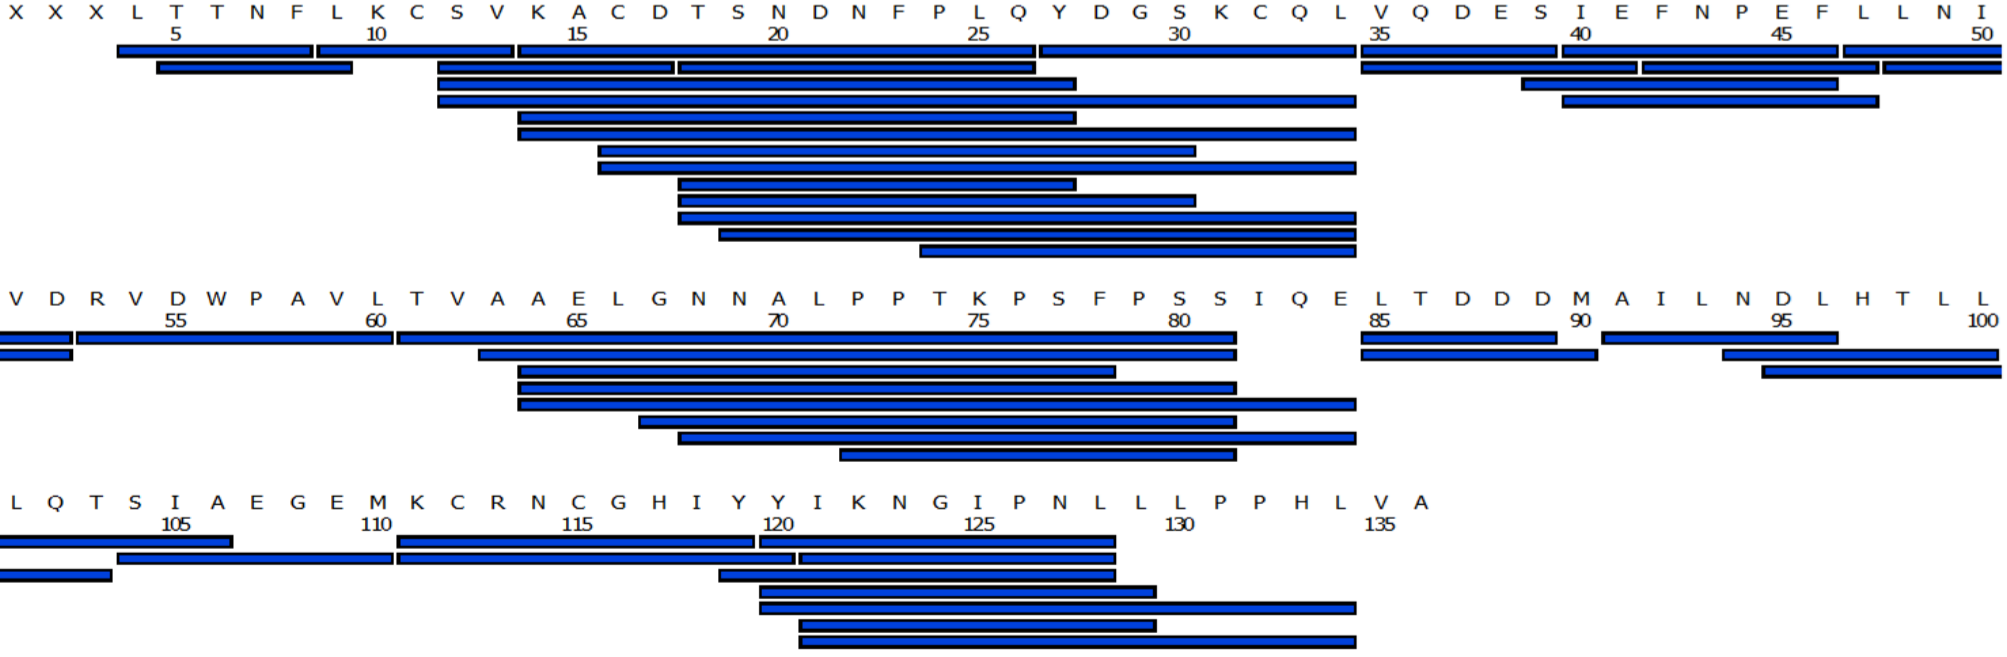

Total: 96.3% Coverage, 4.29 Redundancy

# Figure S6 (to be continued)

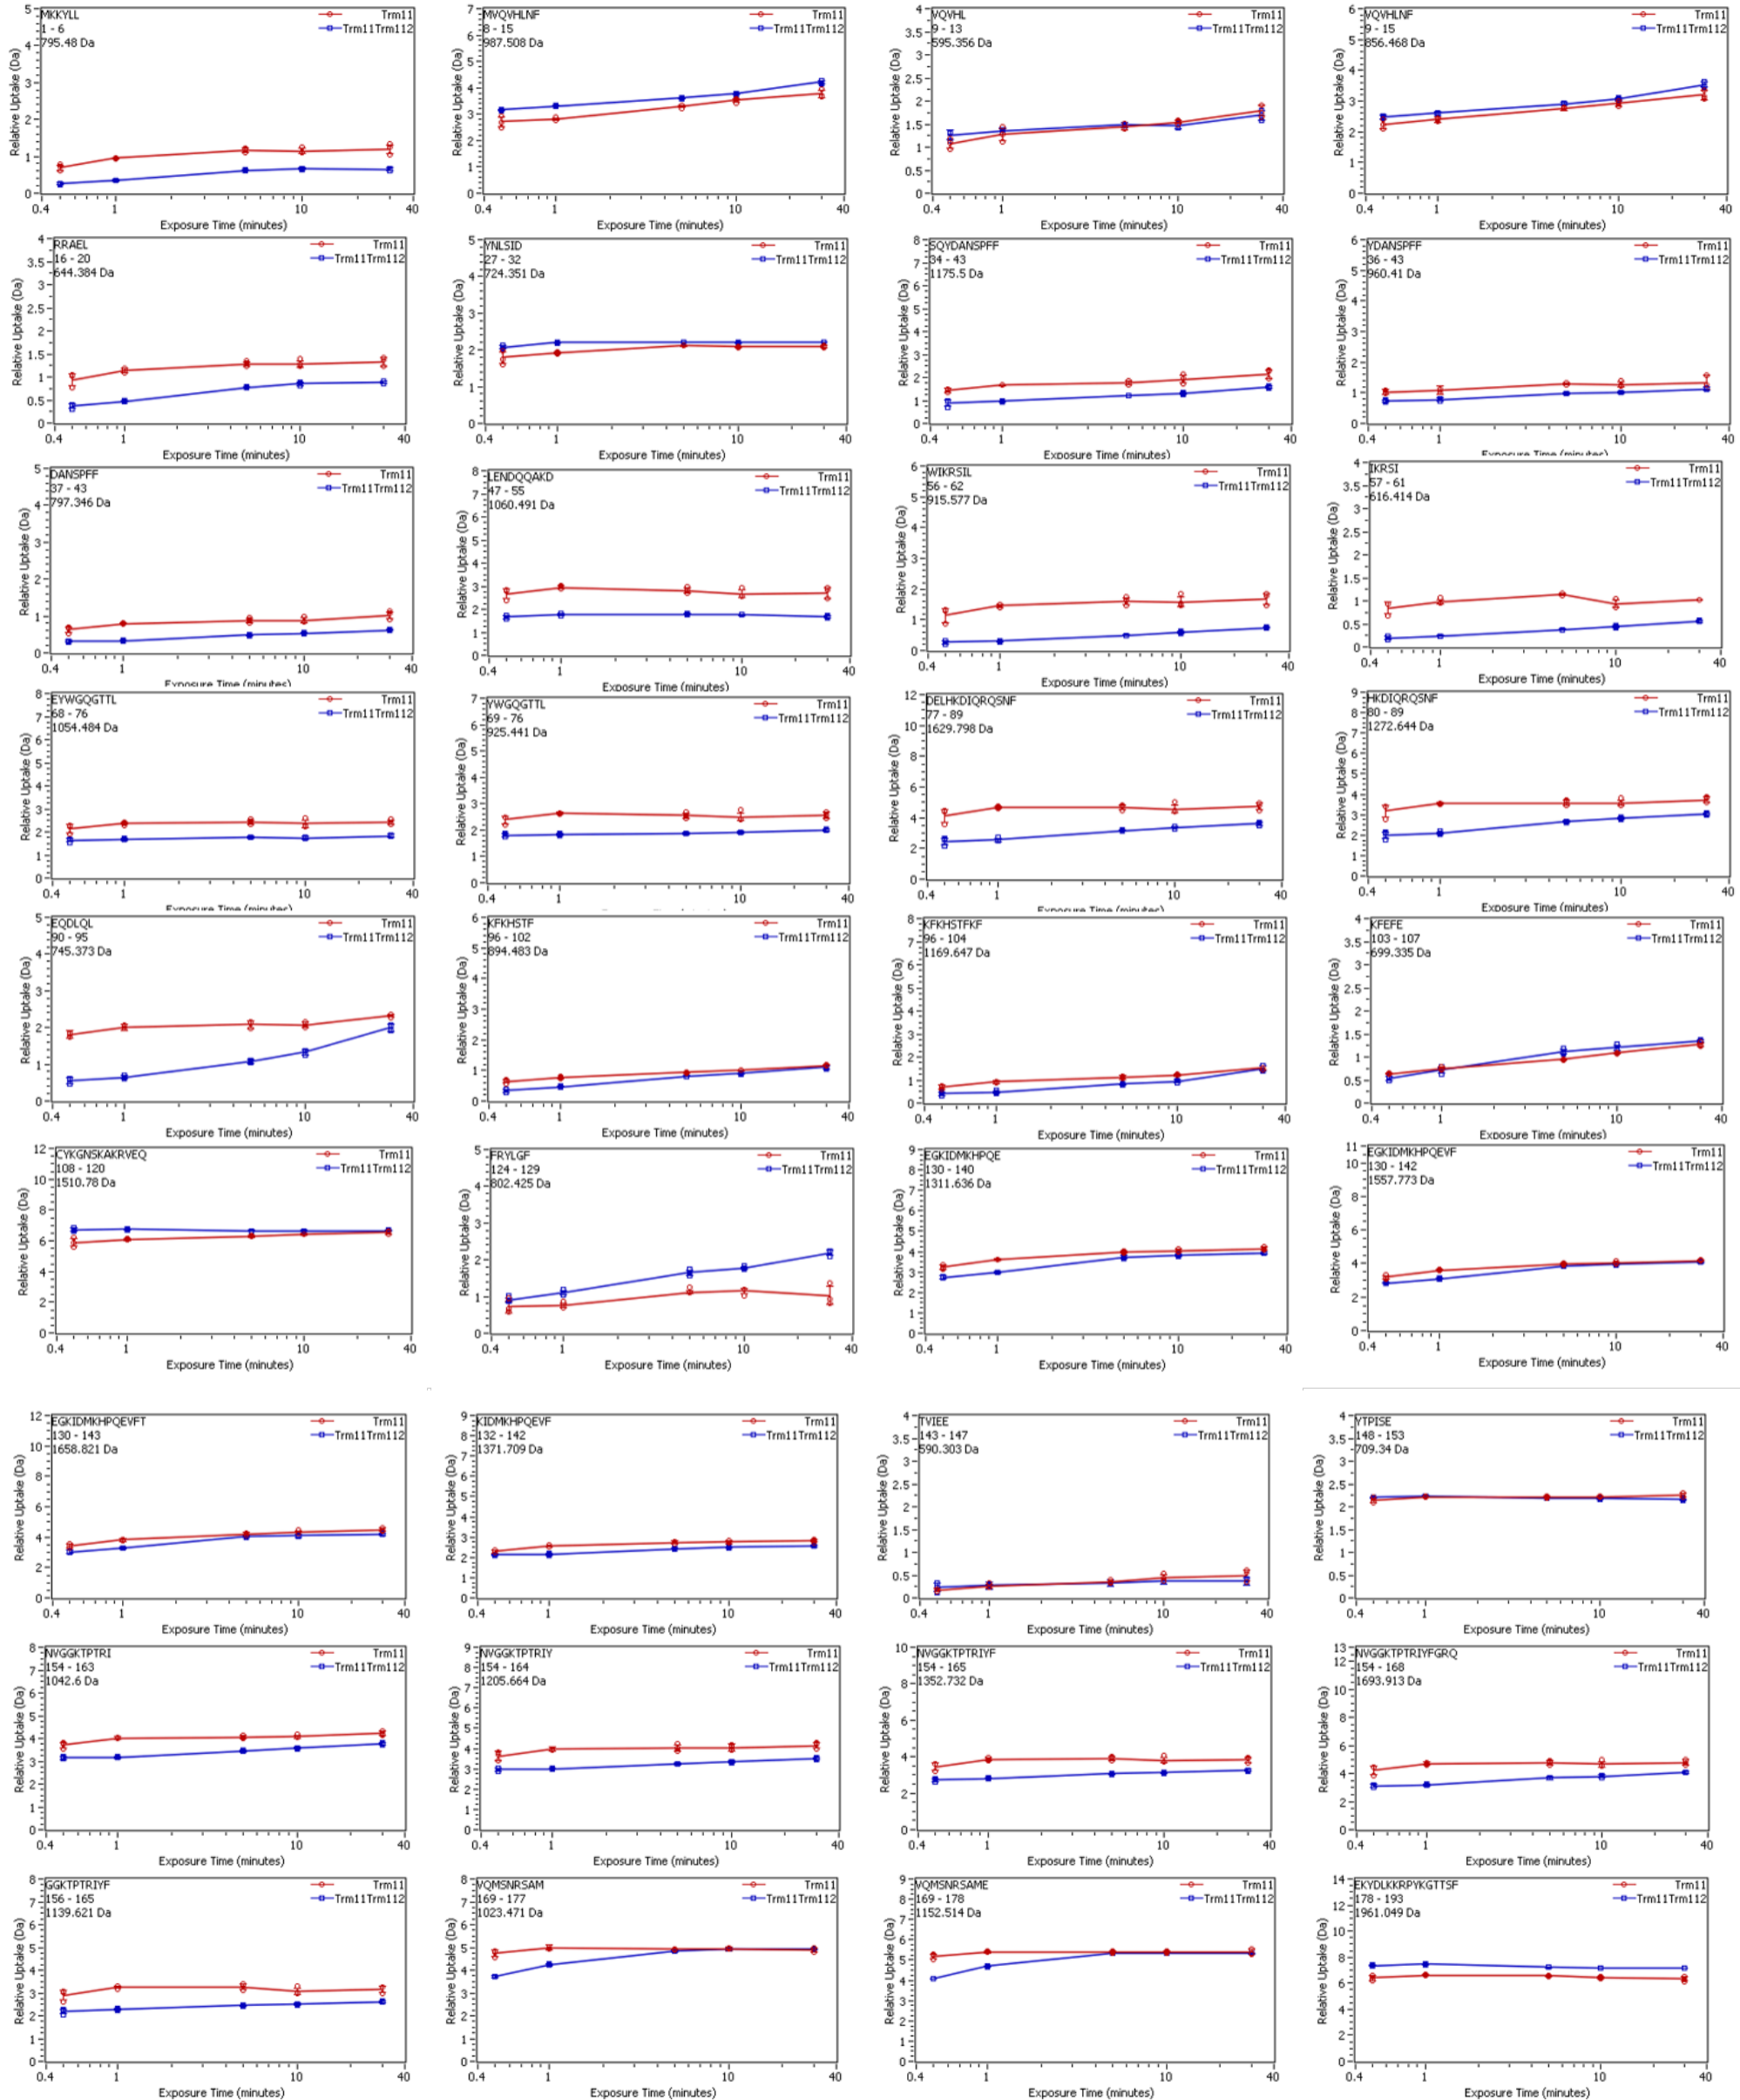

# Figure S6 (continued)

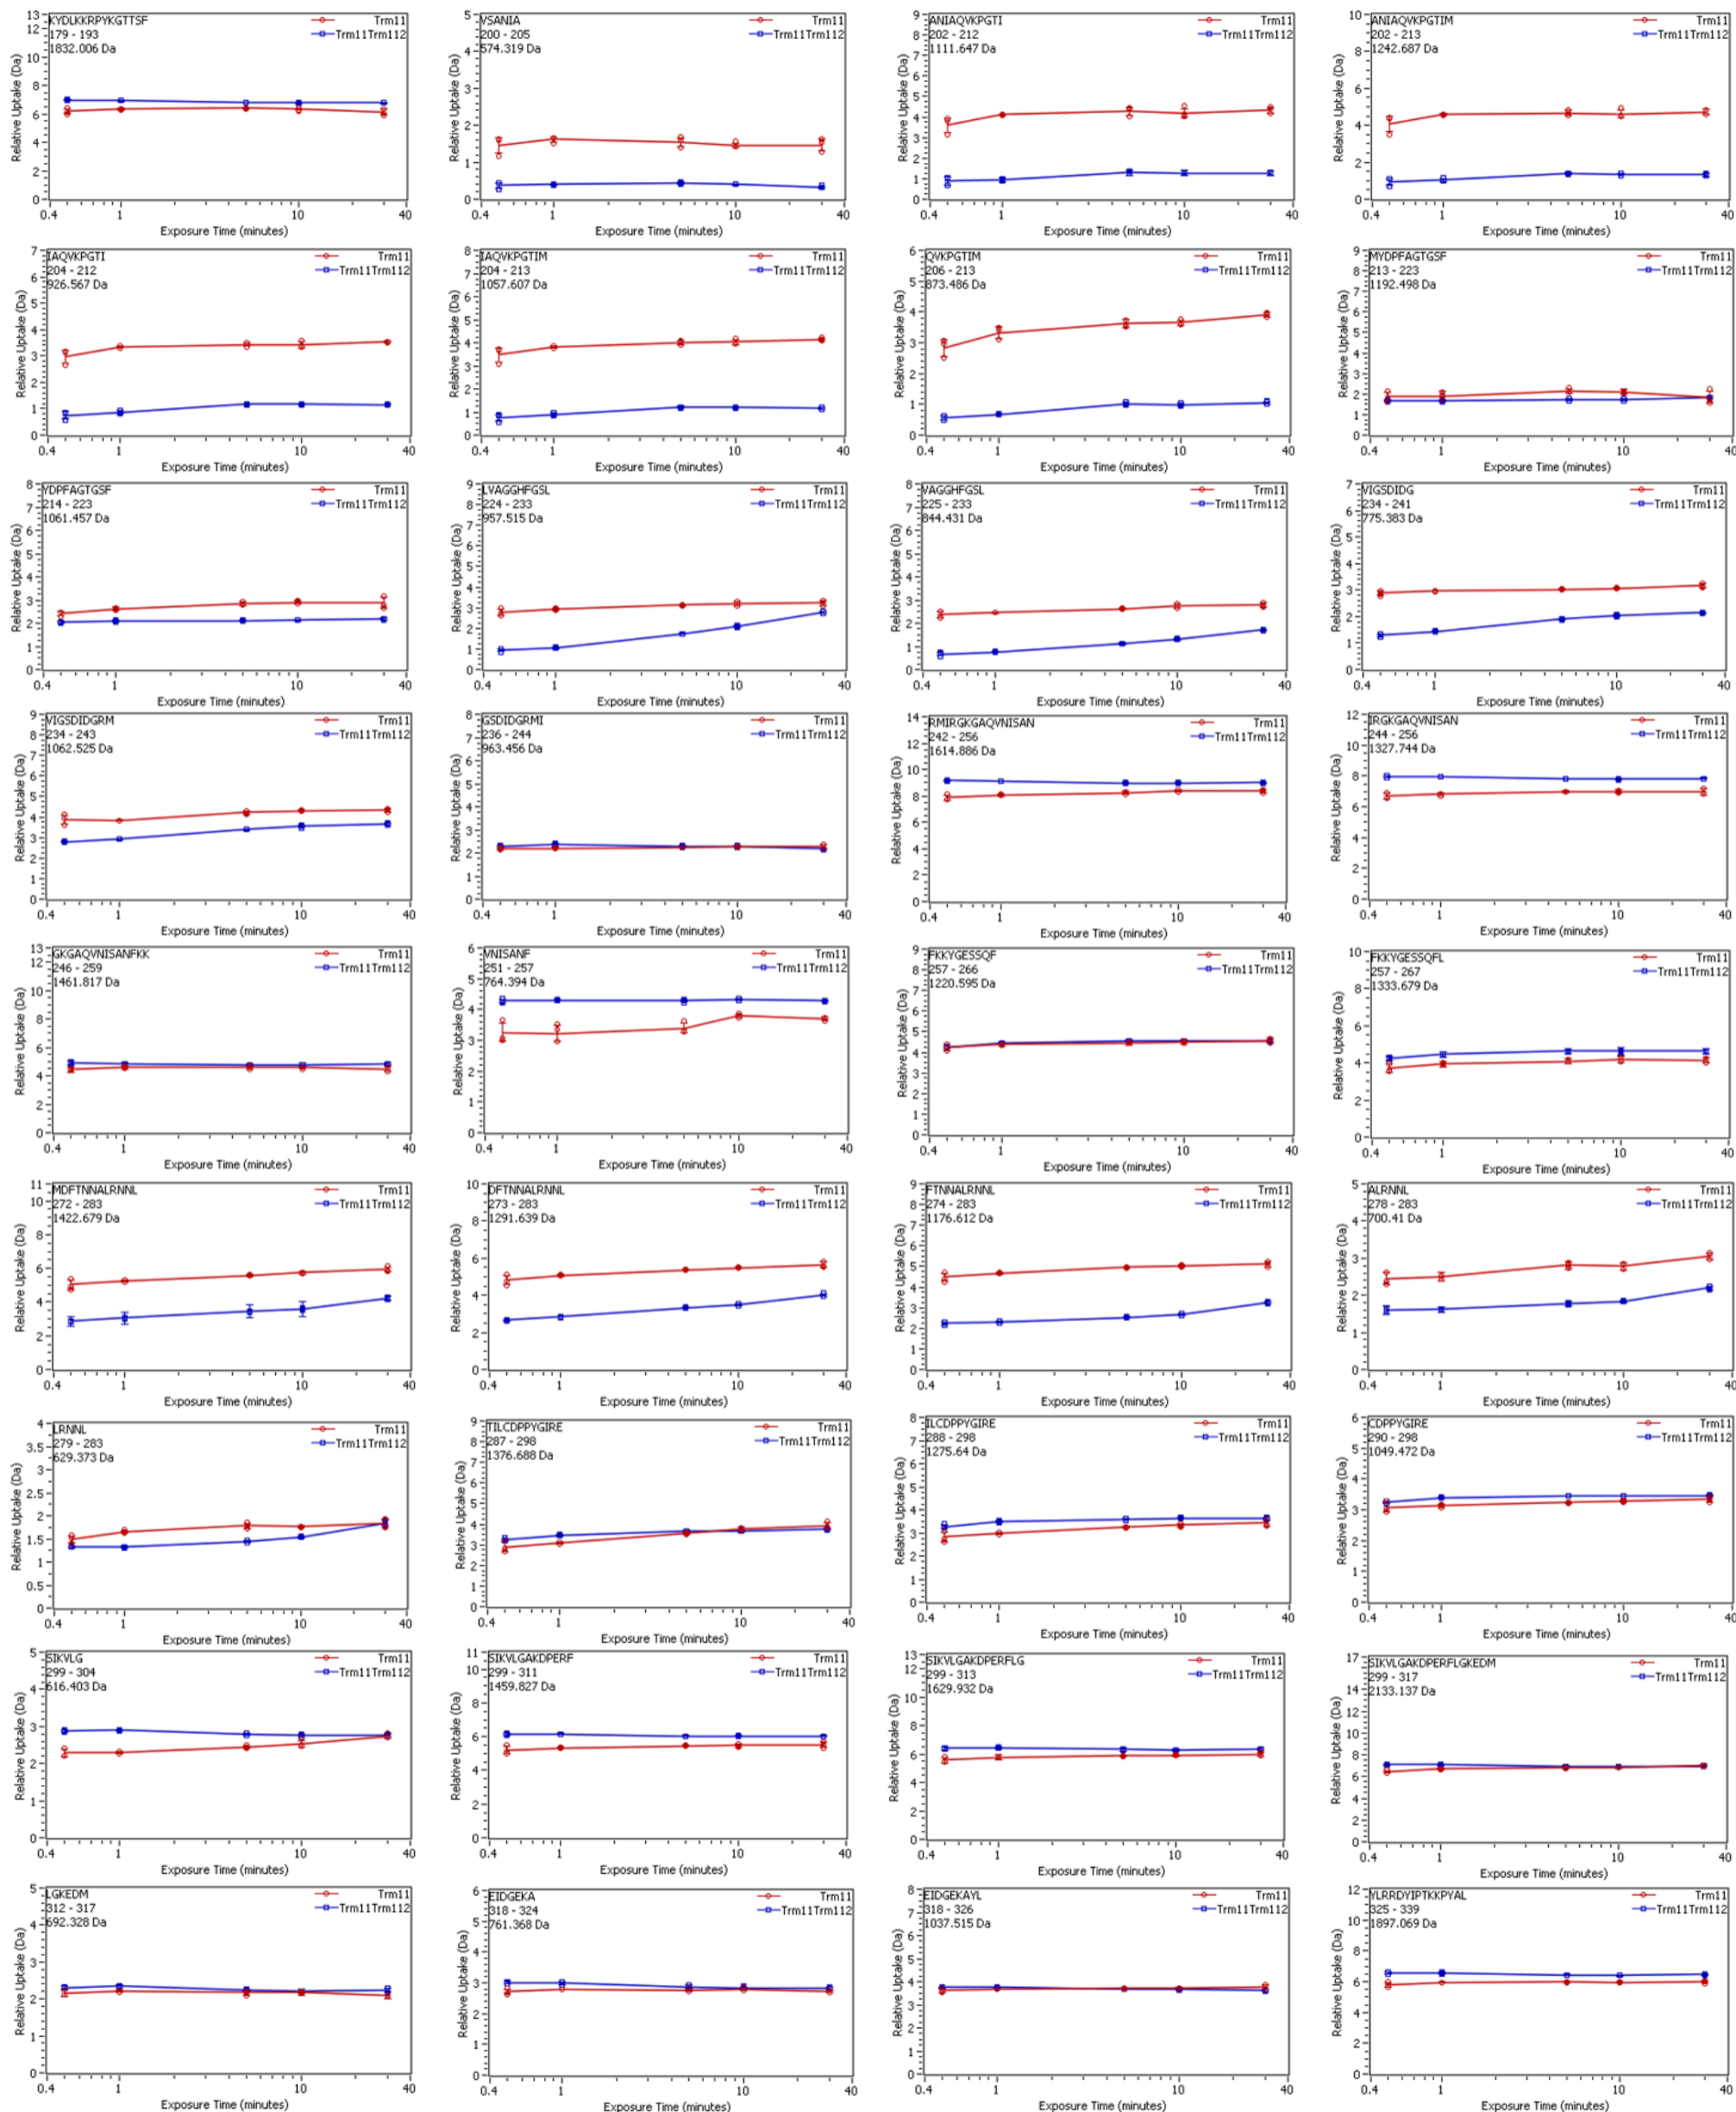

# Figure S6

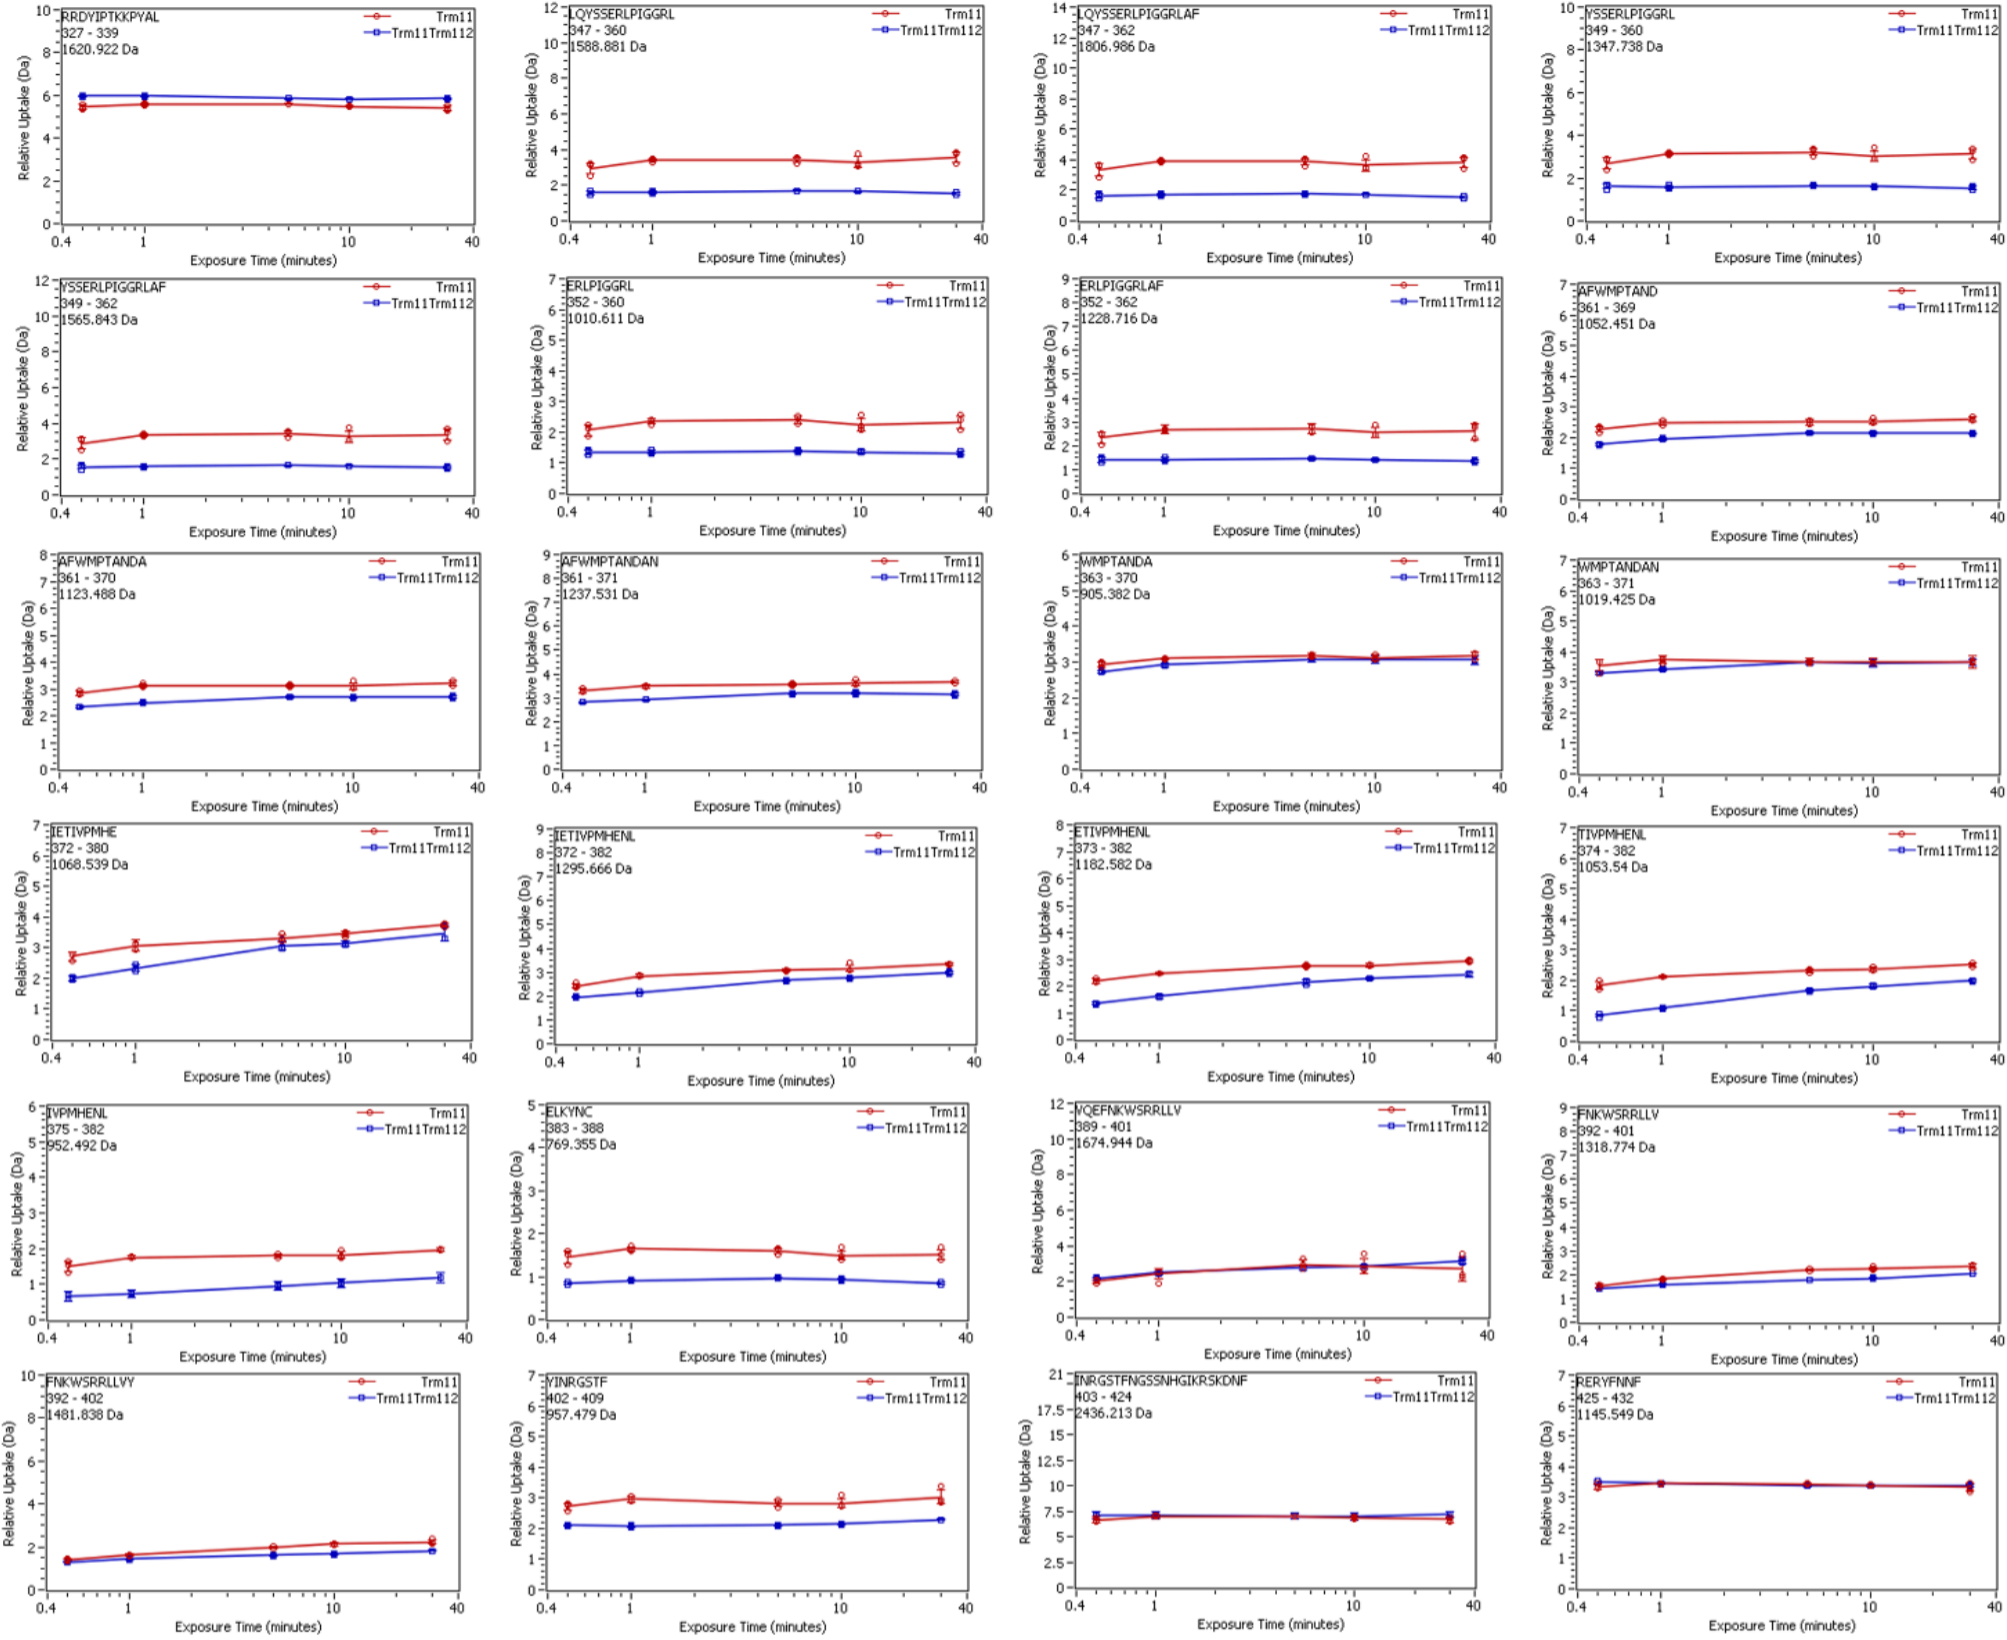

# Figure S7

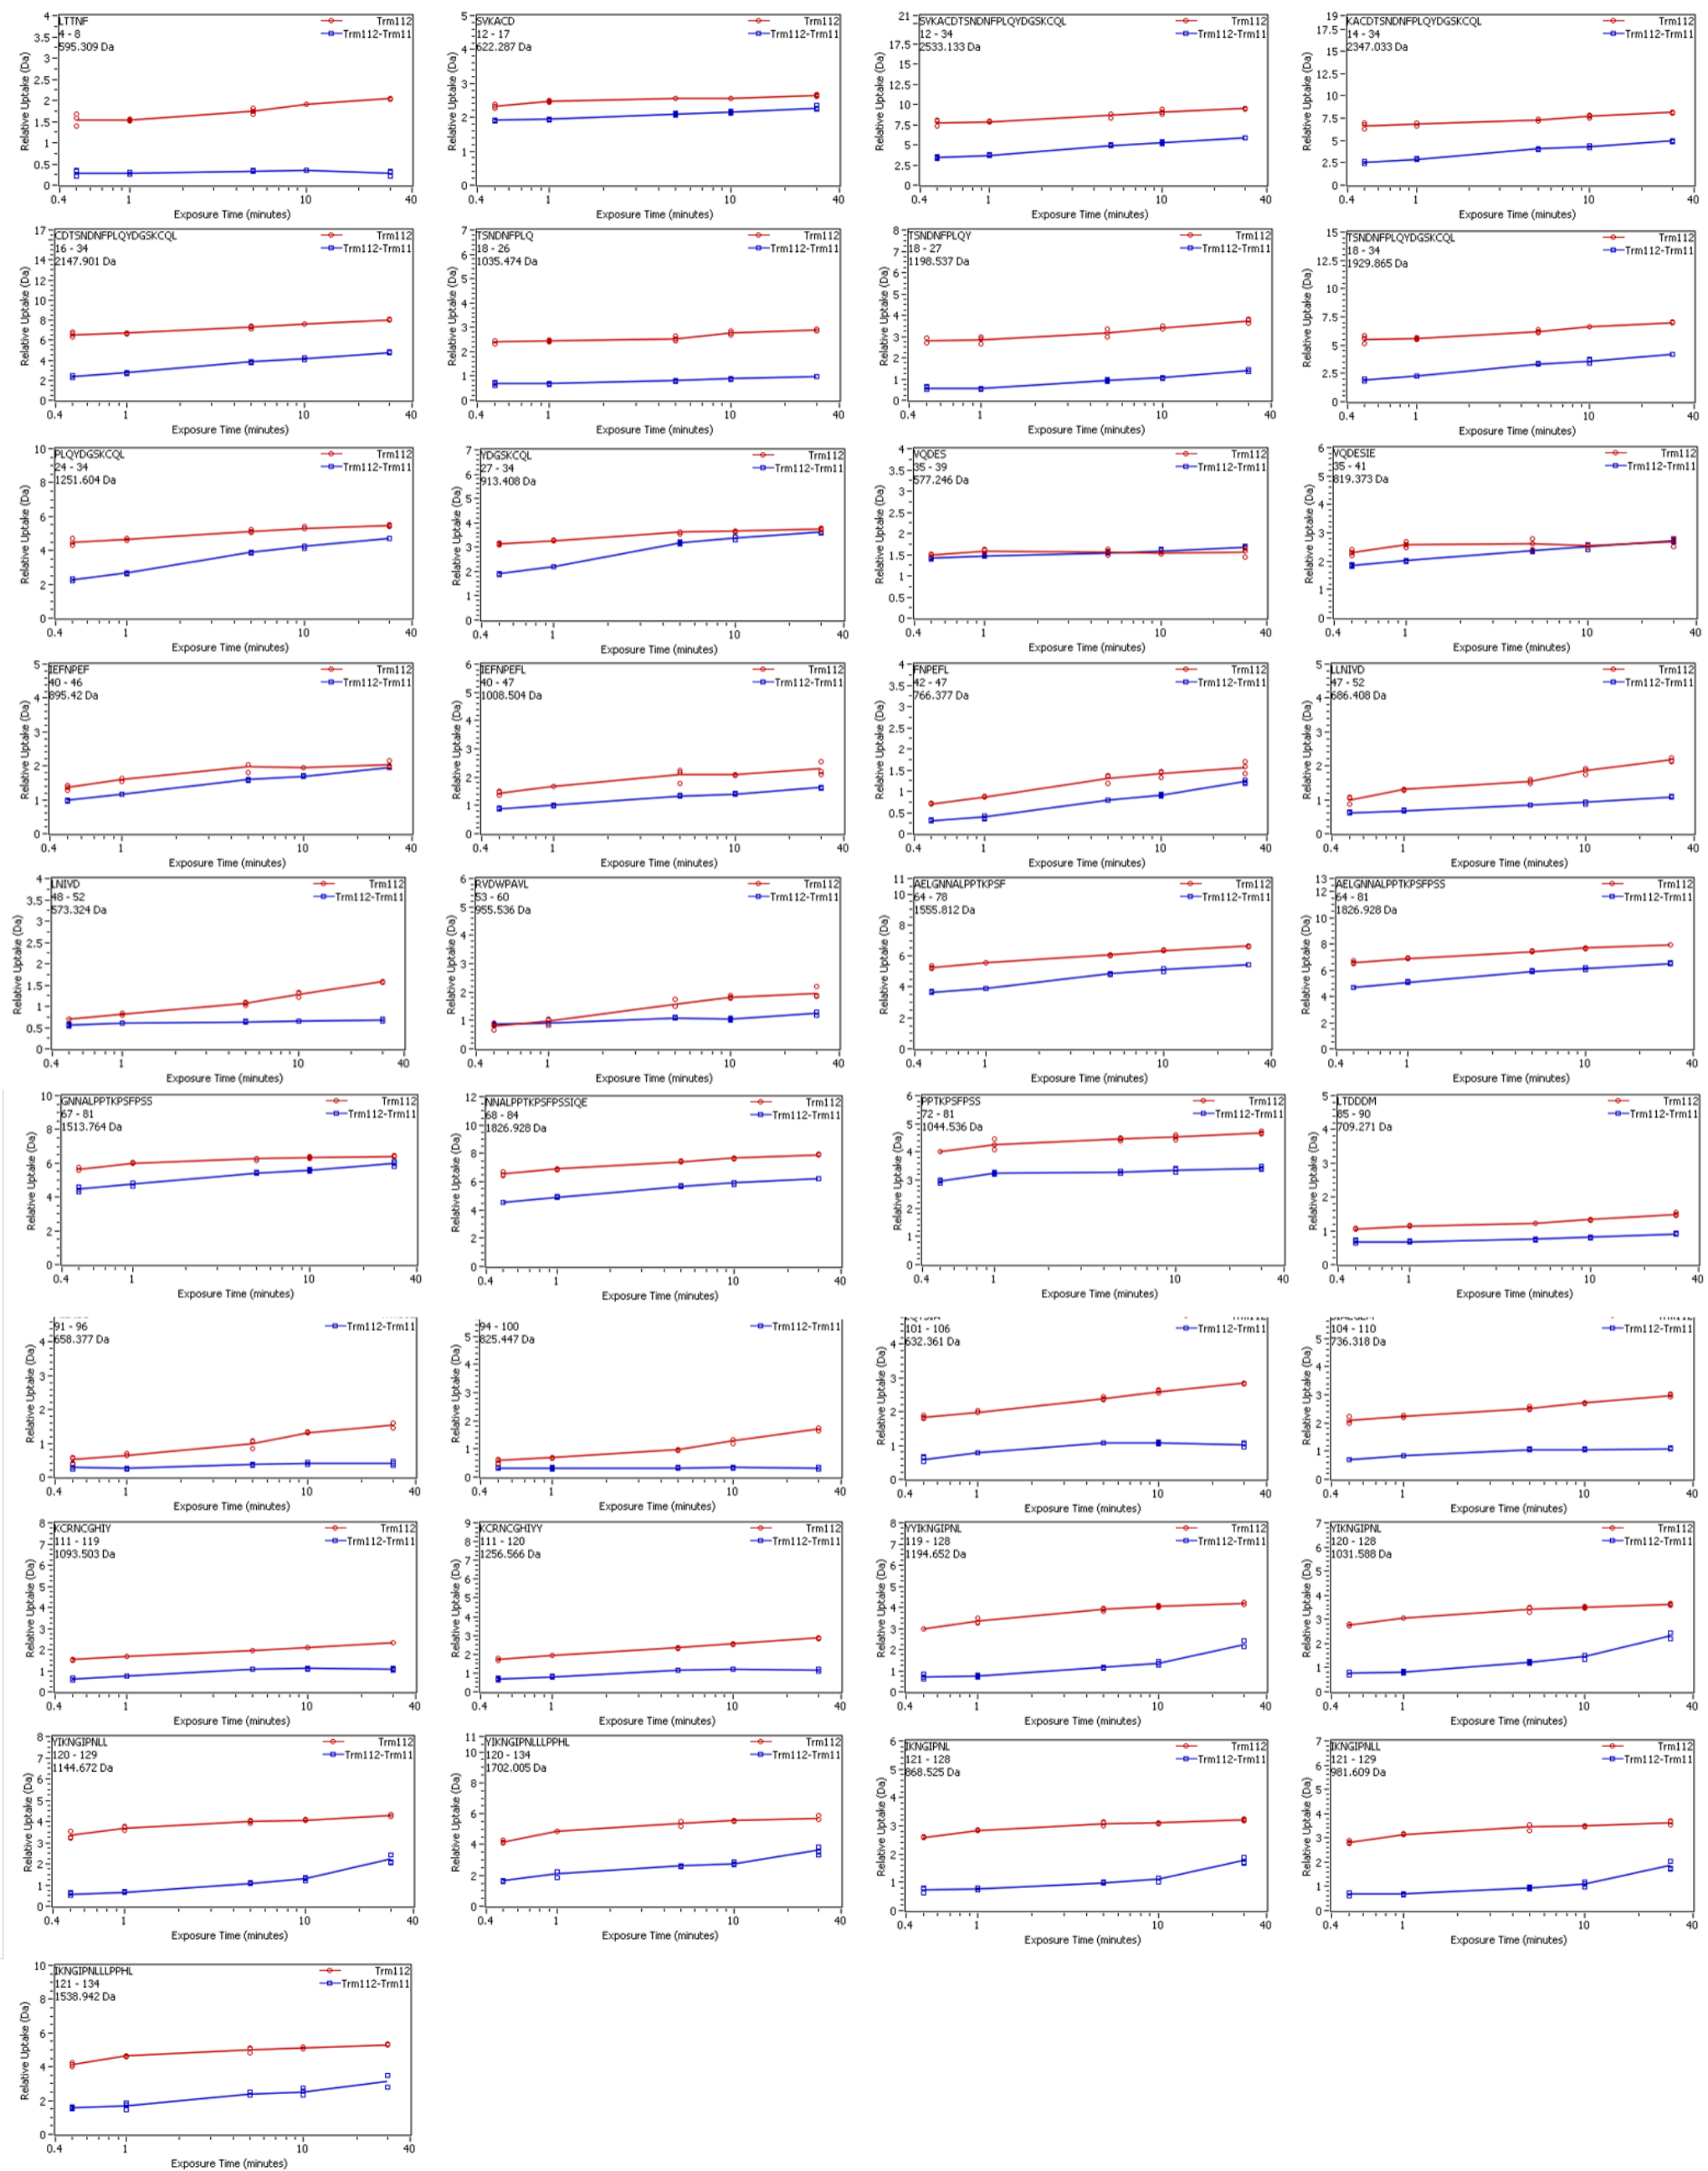

Supplement: gkw1271_Supp.pdf [file gkw1271_Supp.pdf]
